# Supplementary material
Source: Springer Nature journal article supplement (https://www.springermedizin.de/resource/supplementary/12877_2011_762_MOESM3_ESM.pdf/9440312)
Supplement: MOESM3 [file 9440312]

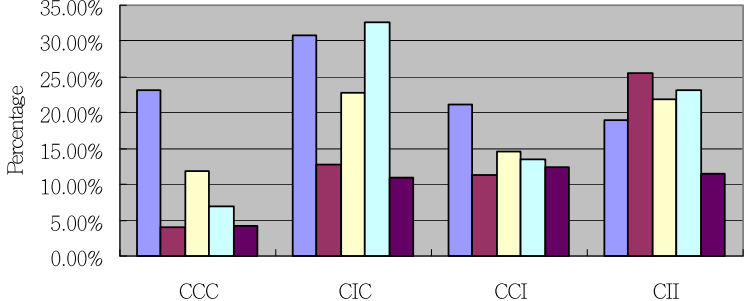

- SENIOR CENTER
- MEALS ON WHEELS
- EAT AT SENIOR CENTER
- PERSONAL CARE SERVICES
- HOMEMAKER/COMPANION SERVICES

Residential Transitions
